# Supplementary material
Source: Research Square preprint supplement (doi:10.21203/rs.3.rs-8707208/v1)
Supplement: Supplementary file 1 [file 385e9a19b5190c16c7aa8207.docx]

**Supplementary material**

**Study design and population**

The data included the anonymized identification number of the hospital, hospital type, primary and secondary diagnoses based on the ICD, operations according the CHOP, sex, age, nationality, insurance, type of admission, nine equivalents of nursing manpower use score (NEMS), Simplified Acute Physiology Severity Score (SAPS), number of hours on the ICU, reoperation, length of hospital stay, and hospital discharge information including in-hospital mortality.[1-4] The FSO classifies hospitals into university, tertiary, three levels of basic, and specialised surgical hospitals according to the number of cases per year and a special hospital score assigned by the Swiss Medical Association (FMH).[5] To ensure data protection, age was categorized into five-year age groups. The Swiss health insurance system divides inpatient hospital stays into three insurance classes: general, semi-private, and private. Semi-private and private represent supplementary insurance options with an impact on room category (two-bedroom for semi-private, single room for private), comfort, and the freedom to choose a doctor and hospital. Medical care and services are independent of the insurance class.[6]

The “Union Internationale Contre le Cancer” (UICC) stage was categorised as stage I/II (all other), III (ICD code C77), IV (ICD code C78 or C79).[7]

**Primary and secondary endpoints**

The 17 Charlson comorbidities were identified through Quan et al.’s ICD codes and determined via the comorbidity package in R.[8, 9] This transforms the ICD codes into binary data of the relevant comorbidities, their (unweighted) sum scores, and their Charlson weighted scores.[10] ICU stay was assumed if the corresponding CHOP code was present (89.13.* in 2013, 99.B7.* afterwards), the number of hours on ICU was>0, NEMS was >0, and SAPS was >0. If the number of hours in the ICU was not stated, it was imputed by linear regression as the sum of the NEMS and the SAPS. If only the NEMS Score was given, the mean of the SAPS was used. If no NEMS was given, the mean of the range according to the CHOP codes for ICU treatment was used.

**Statistical analysis**

*Mortality and postoperative complications*

GAM can handle large datasets, accommodate many predictors, including random effects, and is nonparametric.[11] The inference of the effect of the hospital volume was based on the assumption of the hospital volume as a linear predictor and complemented by an alternative model with splines based on univariate adaptive smooths.[12] The parametric fixed and random effect splines were penalised by a ridge penalty using the identity matrix based on the assumption that the coefficients are independent and identically distributed normal random effects.[13]

*Length of hospital stay*

The quantile regression was performed using the quantreg R library using the algorithm described by Barrodale and Roberts for L1-Regressions.[14] The resulting fitted coefficient Beta for the hospital volume on LOS (β) in the linear regression describes an increase (positive) or decrease (negative) in LOS per additional operation in the hospital. A β of +0.1 means an increase in LOS of 0.1 days for each unit increase in one patient in the annual hospital volume. The Khmaladze-Test was used to test the hypothesis that a linear model specification is of the location shift or location-scale shift form.[15] The test is based on the Doob-Meyer Martingale transformation approach proposed by Khmaladze in 1981 for general goodness of fit problems and was adapted to quantile regression by Koenker and Xiao in 2002.[16] The joint test of equality of the quantile slopes (joint p) tests if there is a difference between the percentiles.

**Table SM 1** Associations between complications and hospital volume and mortality

| **Variable** | **OR hospital volume  and (95% CI)** | | **p value*** | **OR mortality**  **and (95% CI)** | **p value*** |
| --- | --- | --- | --- | --- | --- |
| Myocardial infarction | 1.335 (0.359-4.969) | 0.666 | | 57.539 (5.818-569.029) | **<0.001** |
| Cardiac arrest | 0.699 (0.408-1.198) | 0.193 | | 2.664 (0.593-11.961) | 0.201 |
| Arterial fibrillation | 0.894 (0.759-1.053) | 0.179 | | 1.678 (0.765-3.681) | 0.197 |
| DVT and PE | 0.759 (0.532-1.081) | 0.126 | | 0.392 (0.083-1.844) | 0.236 |
| Pneumonia | 0.797 (0.662-0.961) | **0.017** | | 1.465 (0.633-3.390) | 0.373 |
| Pleural effusion | 0.766 (0.646-0.908) | **0.002** | | 0.675 (0.298-1.533) | 0.348 |
| Pleural empyema | 0.659 (0.496-0.874) | **0.004** | | 2.054 (0.821-5.137) | 0.124 |
| Aspiration | 1.021 (0.787-1.327) | 0.873 | | 1.554 (0.602-4.016) | 0.362 |
| Atelectasis | 1.002 (0.780-1.287) | 0.988 | | 0.980 (0.352-2.729) | 0.969 |
| Mediastinitis | 0.634 (0.444-0.906) | **0.012** | | 1.861 (0.697-4.966) | 0.215 |
| Pneumothorax | 0.782 (0.617-0.992) | **0.043** | | 1.412 (0.516-3.865) | 0.502 |
| Haemothorax | 1.016 (0.388-2.660) | 0.974 | | 11.774 (1.070-129.534) | **0.044** |
| Pulmonal insufficiency, respiratory failure | 0.586 (0.475-0.723) | **<0.001** | | 4.575 (2.053-10.193) | **<0.001** |
| ARDS | 0.618 (0.385-0.992) | **0.046** | | 5.205 (1.750-15.484) | **0.003** |
| Acute kidney injury | 0.720 (0.558-0.928) | **0.011** | | 2.615 (1.132-6.039) | **0.024** |
| Urinary tract infection | 0.619 (0.404-0.948) | **0.028** | | 0.249 (0.022-2.765) | 0.257 |
| Urinary retention | 1.558 (0.994-2.442) | 0.053 | | 0.326 (0.053-1.990) | 0.225 |
| Anastomotic leakage | 0.861 (0.682-1.086) | 0.207 | | 3.758 (1.614-8.753) | **0.002** |
| Anastomotic stenosis | 0.880 (0.631-1.228) | 0.452 | | 0.958 (0.237-3.879) | 0.953 |
| Gastrointestinal ulcer | 0.932 (0.598-1.453) | 0.756 | | 1.915 (0.331-11.089) | 0.468 |
| Peritonitis and intraabdominal abscess | 0.686 (0.658-1.313) | 0.255 | | 3.375 (0.573-19.869) | 0.179 |
| Delayed gastric emptying | 1.021 (0.666-1.565) | 0.924 | | 0.880 (0.200-3.862) | 0.865 |
| Ileus | 0.576 (0.383-0.865) | **0.008** | | 1.732 (0.565-5.310) | 0.337 |
| Bleeding | 0.809 (0.621-1.053) | 0.115 | | 2.858 (1.008-8.106) | **0.048** |
| Shock | - | - | | 3.938 (0.272-56.997) | 0.315 |
| Lymphatic fistula | 1.026 (0.725-1.452) | 0.883 | | 3.324 (0.891-12.407) | 0.074 |
| Wound dehiscence | 0.965 (0.706-1.319) | 0.823 | | 1.786 (0.428-7.452) | 0.426 |
| SSI | 0.822 (0.632-1.071) | 0.147 | | 3.479 (1.290-9.386) | 0.014 |
| Other vascular complication | - | - | | - | - |
| Injury to the heart | - | - | | - | - |
| Injury to the lungs or pleura | 0.550 (0.345-0.878) | **0.012** | | 0.661 (0.085-5.130) | 0.692 |
| Tracheobronchial injury | - | - | | - | - |
| Injury to the thoracic duct | - | - | | - | - |
| Injury to the diaphragm | - | - | | - | - |
| Injury to other or multiple thoracal organs | - | - | | - | - |
| Recurrent laryngeal nerve palsy | 0.558 (0.386-0.807) | **0.002** | | 1.823 (0.516-6.443) | 0.351 |
| Other intraoperative injuries | 1.214 (0.592-2.489) | 0.596 | | 1.234 (0.069-22.134) | 0.887 |
| Intraoperative retained foreign body | - | - | | - | - |
| Other complications | 0.694 (0.565-0.852) | **<0.001** | | 0.458 (.0143-1.460) | 0.187 |
| Reoperation | 0.867 (0.673-1.117) | 0.271 | | - | - |
| *Significant values are bold OR: Odds ratio; CI: Confidence interval; DVT: Deep venous thrombosis; PE: Pulmonary embolism;  ARDS: Acute respiratory distress syndrome; SSI: Surgical site infection | | | | | |

**References**

1. ICD-10-GM Version 2021, Systematisches Verzeichnis, Internationale statistische Klassifikation der Krankheiten und verwandter Gesundheitsprobleme, 10. Revision, Stand: 18. September 2020: Bundesinstitut für Arzneimittel und Medizinprodukte (BfArM) im Auftrag des Bundesministeriums für Gesundheit (BMG) unter Beteiligung der Arbeitsgruppe ICD des Kuratoriums für Fragen der Klassifikation im Gesundheitswesen (KKG); 2020 [Available from: <www.bfarm.de> – Kodiersysteme – Services - Downloads – ICD-10-GM – Version 2021.

2. Schweizerische Operationsklassifikation (CHOP), Systematisches Verzeichnis - Version 2025: Bundesamt für Statistik; 2024 [Available from: <https://www.bfs.admin.ch/bfs/de/home/statistiken/kataloge-datenbanken.assetdetail.32128591.html>.

3. Reis Miranda D, Moreno R, Iapichino G. Nine equivalents of nursing manpower use score (NEMS). Intensive Care Med. 1997;23(7):760-5.

4. Le Gall J-R, Lemeshow S, Saulnier F. A New Simplified Acute Physiology Score (SAPS II) Based on a European/North American Multicenter Study. JAMA. 1993;270(24):2957-63.

5. Sharma N, Schwendimann R, Endrich O, Ausserhofer D, Simon M. Comparing Charlson and Elixhauser comorbidity indices with different weightings to predict in-hospital mortality: an analysis of national inpatient data. BMC Health Services Research. 2021;21(1):13.

6. Bundesgesetz über die Krankenversicherung (KVG): Die Bundesversammlung der Schweizerischen Eidgenossenschaft; 1994 [Available from: <https://www.fedlex.admin.ch/eli/cc/1995/1328_1328_1328/de>.

7. Rice TW, Ishwaran H, Ferguson MK, Blackstone EH, Goldstraw P. Cancer of the Esophagus and Esophagogastric Junction: An Eighth Edition Staging Primer. J Thorac Oncol. 2017;12(1):36-42.

8. Quan H, Sundararajan V, Halfon P, Fong A, Burnand B, Luthi JC, et al. Coding algorithms for defining comorbidities in ICD-9-CM and ICD-10 administrative data. Med Care. 2005;43(11):1130-9.

9. Gasparini A. comorbidity: An R package for computing comorbidity scores. J Open Source Softw. 2018;3:648.

10. van Walraven C, Austin PC, Jennings A, Quan H, Forster AJ. A modification of the Elixhauser comorbidity measures into a point system for hospital death using administrative data. Med Care. 2009;47(6):626-33.

11. Li Z, Wood SN. Faster model matrix crossproducts for large generalized linear models with discretized covariates. Statistics and Computing. 2020;30(1):19-25.

12. Wood SN. On p-values for smooth components of an extended generalized additive model. Biometrika. 2012;100(1):221-8.

13. Wilson M, Welch J, Schuur J, O'Laughlin K, Cutler D. Hospital and emergency department factors associated with variations in missed diagnosis and costs for patients age 65 years and older with acute myocardial infarction who present to emergency departments. Acad Emerg Med. 2014;21(10):1101-8.

14. Koenker RW, D'Orey V. Algorithm AS 229: Computing Regression Quantiles. Journal of the Royal Statistical Society Series C (Applied Statistics). 1987;36(3):383-93.

15. Khmaladze EV. Martingale Approach in the Theory of Goodness-of-Fit Tests. Theory of Probability & Its Applications. 1981;26(1):216-7.

16. Koenker R, Xiao Z. Inference on the Quantile Regression Process. Econometrica. 2002;70(4):1583-612.
