# Supplementary material
Source: Research Square preprint supplement (doi:10.21203/rs.3.rs-8707208/v1)
Supplement: Supplementary file 2 [file 69d093e0679a42ee324f6b4b.docx]

**Table SM 1** Associations between complications and hospital volume and mortality

| **Variable** | **OR hospital volume  and (95% CI)** | | **p value*** | **OR mortality**  **and (95% CI)** | **p value*** |
| --- | --- | --- | --- | --- | --- |
| Myocardial infarction | 1.335 (0.359-4.969) | 0.666 | | 57.539 (5.818-569.029) | **<0.001** |
| Cardiac arrest | 0.699 (0.408-1.198) | 0.193 | | 2.664 (0.593-11.961) | 0.201 |
| Arterial fibrillation | 0.894 (0.759-1.053) | 0.179 | | 1.678 (0.765-3.681) | 0.197 |
| DVT and PE | 0.759 (0.532-1.081) | 0.126 | | 0.392 (0.083-1.844) | 0.236 |
| Pneumonia | 0.797 (0.662-0.961) | **0.017** | | 1.465 (0.633-3.390) | 0.373 |
| Pleural effusion | 0.766 (0.646-0.908) | **0.002** | | 0.675 (0.298-1.533) | 0.348 |
| Pleural empyema | 0.659 (0.496-0.874) | **0.004** | | 2.054 (0.821-5.137) | 0.124 |
| Aspiration | 1.021 (0.787-1.327) | 0.873 | | 1.554 (0.602-4.016) | 0.362 |
| Atelectasis | 1.002 (0.780-1.287) | 0.988 | | 0.980 (0.352-2.729) | 0.969 |
| Mediastinitis | 0.634 (0.444-0.906) | **0.012** | | 1.861 (0.697-4.966) | 0.215 |
| Pneumothorax | 0.782 (0.617-0.992) | **0.043** | | 1.412 (0.516-3.865) | 0.502 |
| Haemothorax | 1.016 (0.388-2.660) | 0.974 | | 11.774 (1.070-129.534) | **0.044** |
| Pulmonal insufficiency, respiratory failure | 0.586 (0.475-0.723) | **<0.001** | | 4.575 (2.053-10.193) | **<0.001** |
| ARDS | 0.618 (0.385-0.992) | **0.046** | | 5.205 (1.750-15.484) | **0.003** |
| Acute kidney injury | 0.720 (0.558-0.928) | **0.011** | | 2.615 (1.132-6.039) | **0.024** |
| Urinary tract infection | 0.619 (0.404-0.948) | **0.028** | | 0.249 (0.022-2.765) | 0.257 |
| Urinary retention | 1.558 (0.994-2.442) | 0.053 | | 0.326 (0.053-1.990) | 0.225 |
| Anastomotic leakage | 0.861 (0.682-1.086) | 0.207 | | 3.758 (1.614-8.753) | **0.002** |
| Anastomotic stenosis | 0.880 (0.631-1.228) | 0.452 | | 0.958 (0.237-3.879) | 0.953 |
| Gastrointestinal ulcer | 0.932 (0.598-1.453) | 0.756 | | 1.915 (0.331-11.089) | 0.468 |
| Peritonitis and intraabdominal abscess | 0.686 (0.658-1.313) | 0.255 | | 3.375 (0.573-19.869) | 0.179 |
| Delayed gastric emptying | 1.021 (0.666-1.565) | 0.924 | | 0.880 (0.200-3.862) | 0.865 |
| Ileus | 0.576 (0.383-0.865) | **0.008** | | 1.732 (0.565-5.310) | 0.337 |
| Bleeding | 0.809 (0.621-1.053) | 0.115 | | 2.858 (1.008-8.106) | **0.048** |
| Shock | - | - | | 3.938 (0.272-56.997) | 0.315 |
| Lymphatic fistula | 1.026 (0.725-1.452) | 0.883 | | 3.324 (0.891-12.407) | 0.074 |
| Wound dehiscence | 0.965 (0.706-1.319) | 0.823 | | 1.786 (0.428-7.452) | 0.426 |
| SSI | 0.822 (0.632-1.071) | 0.147 | | 3.479 (1.290-9.386) | 0.014 |
| Other vascular complication | - | - | | - | - |
| Injury to the heart | - | - | | - | - |
| Injury to the lungs or pleura | 0.550 (0.345-0.878) | **0.012** | | 0.661 (0.085-5.130) | 0.692 |
| Tracheobronchial injury | - | - | | - | - |
| Injury to the thoracic duct | - | - | | - | - |
| Injury to the diaphragm | - | - | | - | - |
| Injury to other or multiple thoracal organs | - | - | | - | - |
| Recurrent laryngeal nerve palsy | 0.558 (0.386-0.807) | **0.002** | | 1.823 (0.516-6.443) | 0.351 |
| Other intraoperative injuries | 1.214 (0.592-2.489) | 0.596 | | 1.234 (0.069-22.134) | 0.887 |
| Intraoperative retained foreign body | - | - | | - | - |
| Other complications | 0.694 (0.565-0.852) | **<0.001** | | 0.458 (.0143-1.460) | 0.187 |
| Reoperation | 0.867 (0.673-1.117) | 0.271 | | - | - |
| *Significant values are bold OR: Odds ratio; CI: Confidence interval; DVT: Deep venous thrombosis; PE: Pulmonary embolism;  ARDS: Acute respiratory distress syndrome; SSI: Surgical site infection | | | | | |
